# Supplementary material for: Associations between Alcohol-Free Sources of Reinforcement and the Frequency of Alcohol and Cannabis Co-Use among College Freshmen
Source: MDPI journal article supplement (doi:10.3390/ijerph20042884), 2023-02-07
Supplement: s1 [file s1]

### Supplemental Information

Pearson correlations for study variables of interest are provided in Table S1. As specified in the main article text, the co-use outcome variable was positively skewed and zero-inflated, thus our characterization of the association between the variables of interest using zero-inflated Poisson regression is a better fit to the data and representation of the relationships among variables given their distributional properties.

**Table S1. Correlation Matrix for Study Variables**

|   | 1                   | 2                   | 3                  | 4 |
|---|---------------------|---------------------|--------------------|---|
| 1 | 1                   |                     |                    |   |
| 2 | -0.07<br>(p = .530) | 1                   |                    |   |
| 3 | -0.21<br>(p = .057) | -0.13<br>(p = .216) | 1                  |   |
| 4 | -0.27<br>(p = .010) | 0.11<br>(p = .313)  | 0.51<br>(p < .001) | 1 |

<sup>1</sup> The order of variables are as follows: Proportionate Alcohol-free Reinforcement (1), Mean of Alcohol-free Reinforcement (2), Days of Co-use of Alcohol and Cannabis (3), Days of Alcohol use (4)

Overall, the results of the ZIP models for each alcohol-free reinforcement sub-scale indicated that most types of alcohol-free reinforcement were significantly associated with co-use frequency (Table S2). Specifically, results indicated that among individuals who endorsed co-use, individuals with higher alcohol-free reinforcement from peer interactions, family interactions, and school activities engaged in fewer days of co-use of alcohol and cannabis (Table S2). These associations were significant after controlling for days of alcohol use and gender as covariates. Alcohol-free reinforcement from dating and sexual activities was not significantly associated with days of co-use among individuals who endorsed co-use (Table S2). Alcohol-free reinforcement from the six sub-scales did not meaningfully distinguish individuals who did not engage in co-use, relative to chance (Table S2).

**Table S2** Association between Types of Alcohol-Free Reinforcement and Days of Co-use of Alcohol and Cannabis

| Variables                       | Estimate <sup>1</sup> | S.E. | 95% CI         | z     | p value |
|---------------------------------|-----------------------|------|----------------|-------|---------|
| <b>Peer Interaction</b>         |                       |      |                |       |         |
| <i>Count model</i>              |                       |      |                |       |         |
| Mean Alcohol-Free Reinforcement | -0.21                 | 0.05 | [-0.31, -0.11] | -3.99 | < .001  |
| Gender [Male]                   | -0.34                 | 0.31 | [-0.93, 0.26]  | -1.10 | 0.273   |
| Days of Alcohol use             | 0.17                  | 0.04 | [0.10, 0.24]   | 4.87  | < .001  |

|                                 |       |      |                |       |        |
|---------------------------------|-------|------|----------------|-------|--------|
| <b>Peer Interaction</b>         |       |      |                |       |        |
| <i>Zero-inflated model</i>      |       |      |                |       |        |
| Mean Alcohol-Free Reinforcement | -0.01 | 0.11 | [-0.23, 0.20]  | -0.11 | 0.911  |
| Gender [Male]                   | -0.20 | 0.66 | [-1.48, 1.09]  | -0.30 | 0.764  |
| Days of Alcohol use             | -0.20 | 0.03 | [0.07, 0.21]   | 4.13  | < .001 |
| <b>Family Interaction</b>       |       |      |                |       |        |
| <i>Count model</i>              |       |      |                |       |        |
| Mean Alcohol-Free Reinforcement | -0.17 | 0.04 | [-0.25, -0.09] | -4.23 | < .001 |
| Gender [Male]                   | 0.15  | 0.34 | [-0.52, 0.82]  | 0.45  | 0.655  |
| Days of Alcohol use             | 0.16  | 0.04 | [0.09, 0.24]   | 4.20  | < .001 |
| <b>Family Interaction</b>       |       |      |                |       |        |
| <i>Zero-inflated model</i>      |       |      |                |       |        |
| Mean Alcohol-Free Reinforcement | -0.02 | 0.11 | [-0.24, 0.20]  | -0.16 | 0.876  |
| Gender [Male]                   | -0.07 | 0.71 | [-1.47, 1.32]  | -0.10 | 0.919  |
| Days of Alcohol use             | -0.19 | 0.07 | [-0.34, -0.05] | -2.62 | 0.009  |
| <b>Dating</b>                   |       |      |                |       |        |
| <i>Count model</i>              |       |      |                |       |        |
| Mean Alcohol-Free Reinforcement | -0.05 | 0.04 | [-0.13, 0.03]  | -1.20 | 0.230  |
| Gender [Male]                   | -0.55 | 0.29 | [-1.11, 0.01]  | -1.92 | 0.55   |
| Days of Alcohol use             | 0.11  | 0.04 | [0.05, 0.18]   | 3.26  | < .001 |
| <b>Dating</b>                   |       |      |                |       |        |
| <i>Zero-inflated model</i>      |       |      |                |       |        |
| Mean Alcohol-Free Reinforcement | 0.04  | 0.08 | [-0.11, 0.20]  | 0.53  | 0.594  |
| Gender [Male]                   | -0.25 | 0.64 | [-1.51, 1.00]  | -0.40 | 0.691  |
| Days of Alcohol use             | -0.21 | 0.07 | [-0.35, -0.08] | -3.16 | 0.002  |
| <b>Sexual Activities</b>        |       |      |                |       |        |
| <i>Count model</i>              |       |      |                |       |        |
| Mean Alcohol-Free Reinforcement | -0.07 | 0.04 | [-0.14, 0.01]  | -1.74 | 0.083  |
| Gender [Male]                   | -0.42 | 0.28 | [-0.97, 0.12]  | -1.53 | 0.127  |
| Days of Alcohol use             | 0.14  | 0.03 | [0.07, 0.21]   | 4.13  | < .001 |

|                                 |        |      |                |       |        |
|---------------------------------|--------|------|----------------|-------|--------|
| <b>Sexual Activities</b>        |        |      |                |       |        |
| <i>Zero-inflated model</i>      |        |      |                |       |        |
| Mean Alcohol-Free Reinforcement | -0.03  | 0.09 | [-0.21, 0.15]  | -0.31 | 0.757  |
| Gender [Male]                   | -0.22  | 0.64 | [-1.48, 1.04]  | -0.35 | 0.728  |
| Days of Alcohol use             | -0.20  | 0.07 | [-0.34, -0.07] | -2.95 | 0.003  |
| <b>School Activities</b>        |        |      |                |       |        |
| <i>Count model</i>              |        |      |                |       |        |
| Mean Alcohol-Free Reinforcement | -0.09  | 0.03 | [-0.14, -0.03] | -2.87 | 0.004  |
| Gender [Male]                   | -0.29  | 0.29 | [-0.86, 0.27]  | -1.02 | 0.308  |
| Days of Alcohol use             | 0.15   | 0.03 | [0.08, 0.21]   | 4.27  | < .001 |
| <b>School Activities</b>        |        |      |                |       |        |
| <i>Zero-inflated model</i>      |        |      |                |       |        |
| Mean Alcohol-Free Reinforcement | -0.003 | 0.10 | [-0.19, 0.18]  | -0.04 | 0.967  |
| Gender [Male]                   | -0.14  | 0.65 | [-1.42, 1.13]  | -0.22 | 0.824  |
| Days of Alcohol use             | -0.20  | 0.07 | [-0.34, -0.07] | -2.92 | 0.004  |
